# Supplementary material for: High-performance fuel electrodes based on NbTi0.5M0.5O4 (M = Ni, Cu) with reversible exsolution of the nano-catalyst for steam electrolysis
Source: Royal Society of Chemistry journal article supplement (doi:10.1039/c3ta10404d), 2013-01-01

**Fig.S1** The relationship between temperature and conductivity of the oxidized  $\text{Nb}_{1.33}\text{Ti}_{0.67}\text{O}_4$  ( $\text{Nb}_2\text{TiO}_7$ ) sample.

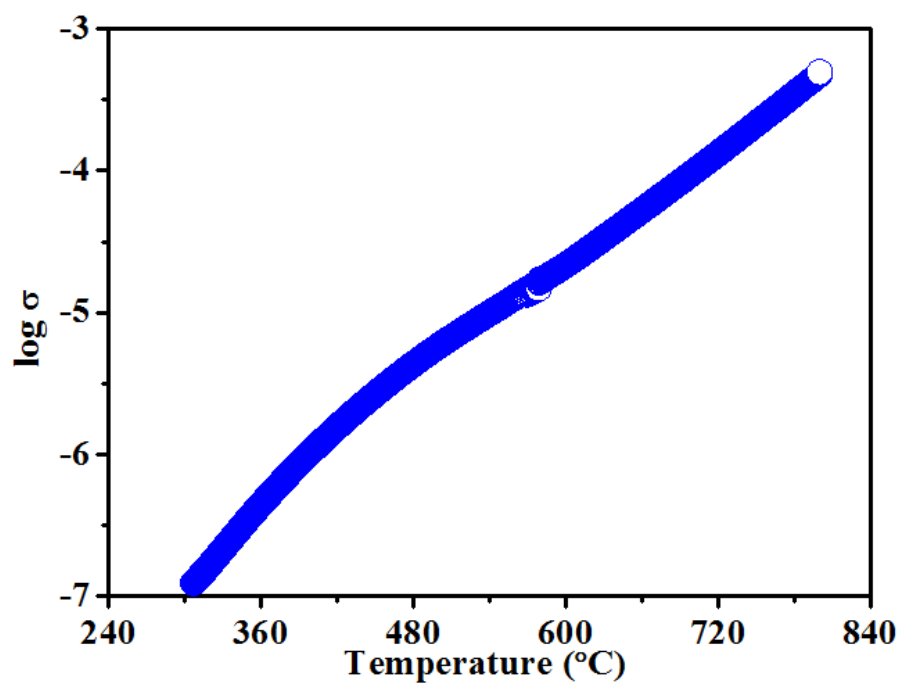

**Fig.S2** The relationship between temperature and conductivity of oxide  $\text{NbTi}_{0.5}\text{Ni}_{0.5}\text{O}_4$  sample.

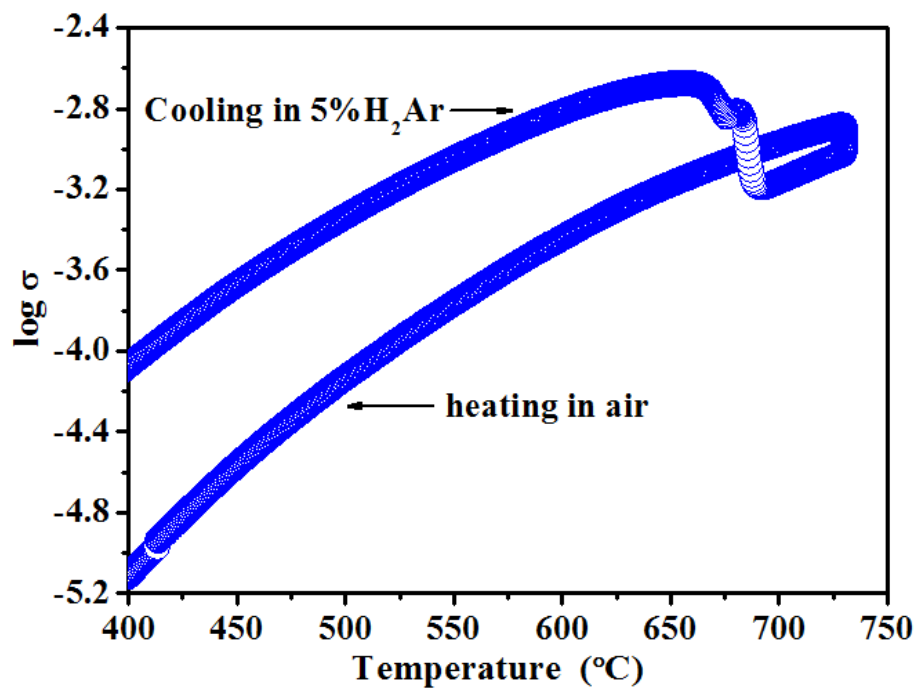

**Fig.S3** The relationship between temperature and conductivity of the  $\text{NbTi}_{0.5}\text{Cu}_{0.5}\text{O}_4$  sample which was exposed to 5%  $\text{H}_2/\text{Ar}$  when the temperature reaches  $730^\circ\text{C}$ .

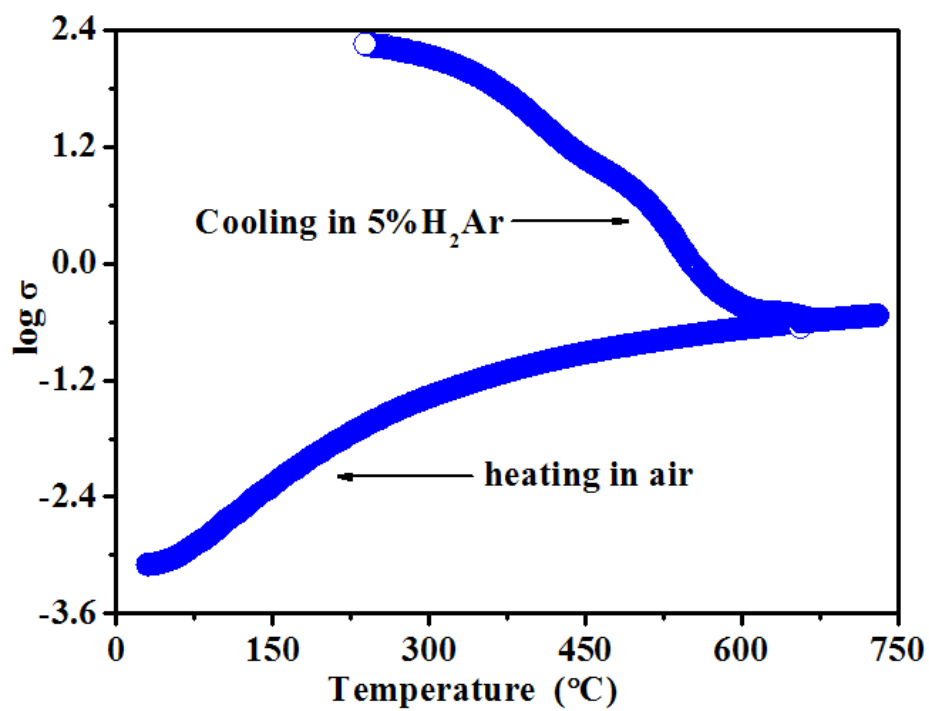

**Fig.S4** AC impedance of the symmetric solid oxide cells NTO-SDC/YSZ/NTO-SDC tested at 800 °C in pure H<sub>2</sub> under different current densities, where the NTO is Nb<sub>1.33</sub>Ti<sub>0.67</sub>O<sub>4</sub>.

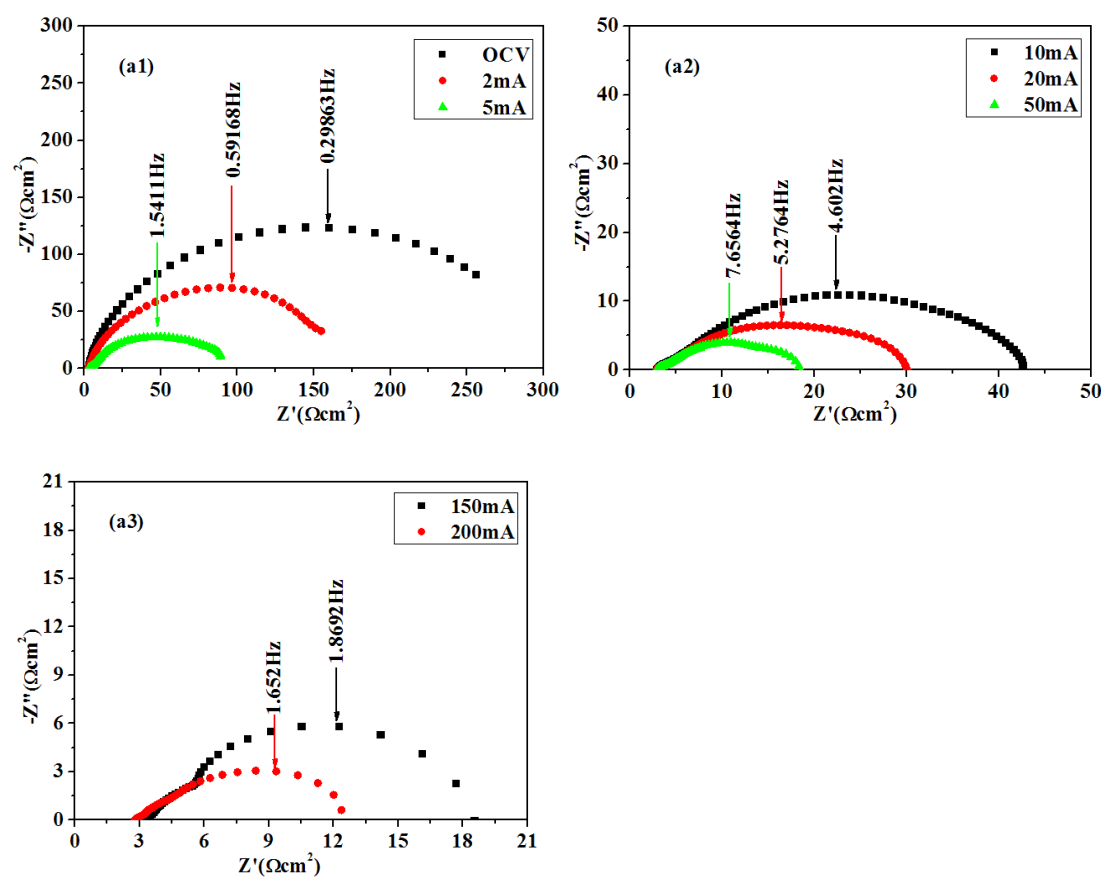

**Fig.S5** AC impedance of the symmetric solid oxide cells NTO-SDC/YSZ/NTO-SDC tested at 800 °C at OCV under different hydrogen partial pressure, where the NTO is  $\text{Nb}_{1.33}\text{Ti}_{0.67}\text{O}_4$ .

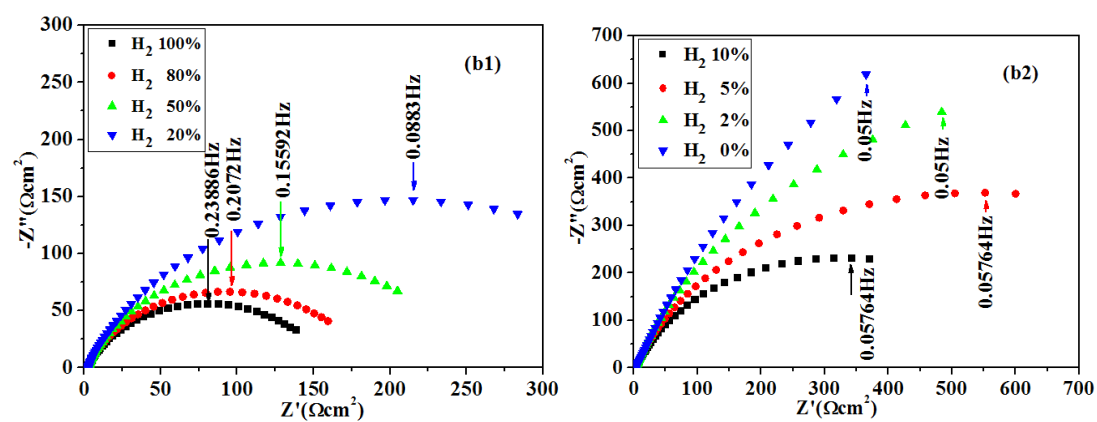

**Fig.S6** I-V curve of the solid oxide electrolyzer based on Ni-SDC fuel electrode for steam electrolysis (4% H<sub>2</sub>/Ar/3% H<sub>2</sub>O) at 800 °C.

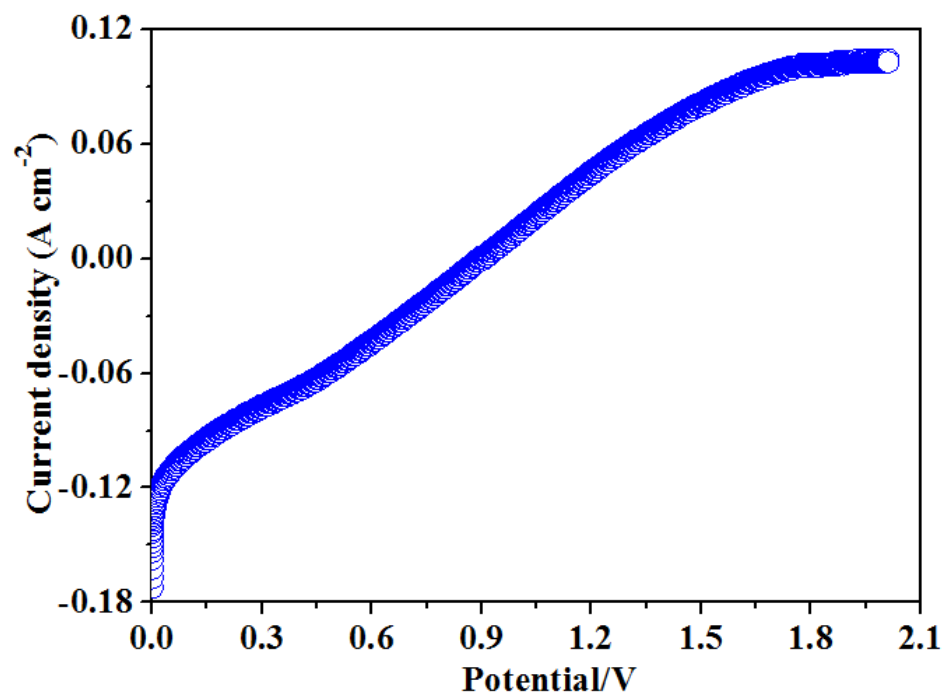

**Fig.S7** AC impedance of the solid oxide electrolyzer based on Ni-SDC composite fuel electrodes for steam electrolysis with 4% $H_2$ /Ar/3% $H_2O$  fed to fuel electrode and oxygen electrode in static air at 800 °C.

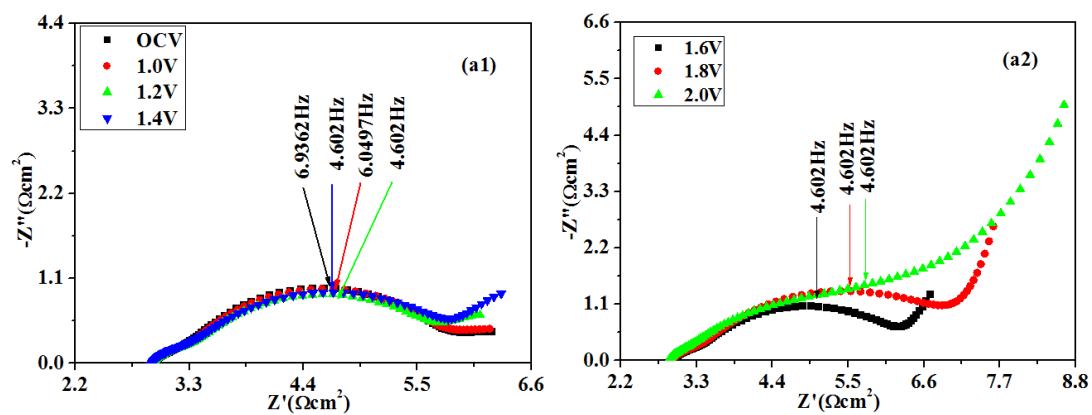

**Fig.S8** (a) Short-term performance of the solid oxide electrolyzers based on Ni-SDC fuel electrodes for steam electrolysis (4% $H_2$ /Ar/3% $H_2O$ ); (b)  $H_2$  production and current efficiency based on Ni-SDC composite fuel electrodes.

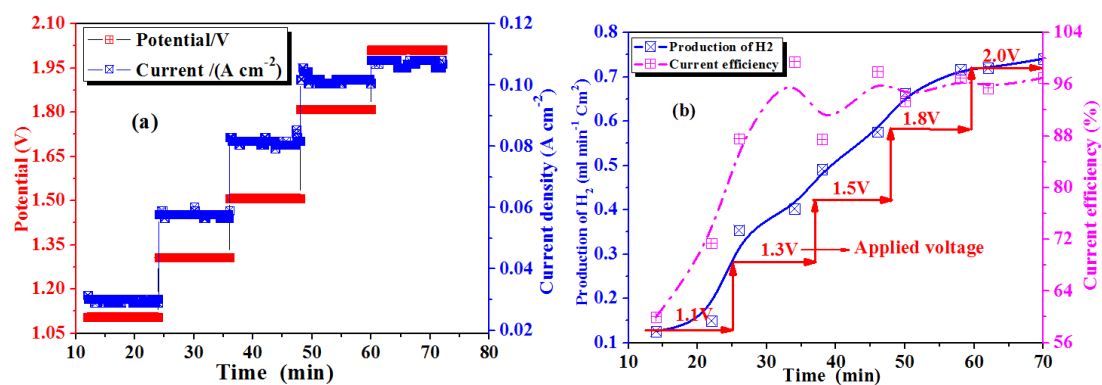

Supplement: c3ta10404d.pdf [file c3ta10404d.pdf]
